# Supplementary material for: Identifying tumor promoting genomic alterations in tumor-associated fibroblasts via retrovirus-insertional mutagenesis
Source: PubMed Central journal article supplement (PMC5722558; doi:10.18632/oncotarget.21881), 2017-10-16
Supplement: oncotarget-08-97231-s001.pdf [file oncotarget-08-97231-s001.pdf]

## Identifying tumor promoting genomic alterations in tumor-associated fibroblasts via retrovirus-insertional mutagenesis

### SUPPLEMENTARY MATERIALS

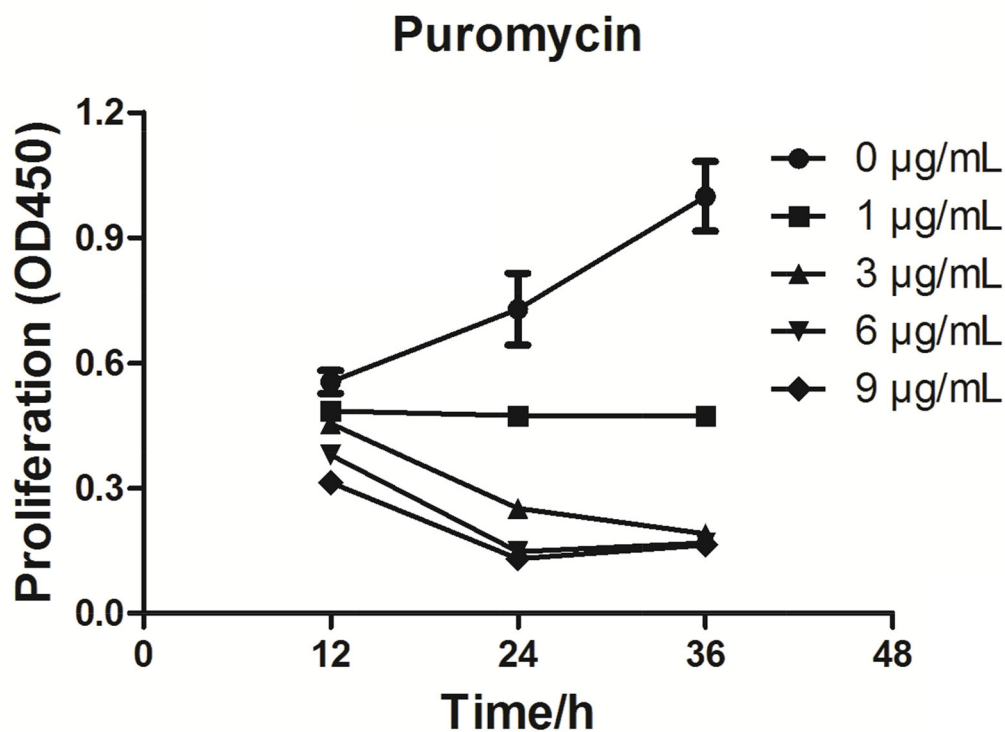

**Supplementary Figure 1: Puromycin effectively inhibited proliferation of FB61 cells *in vitro*.** FB61 tumor cell line ( $5 \times 10^3$  per well) were cultured in a 96-well flat bottom plate in the presence of increasing puromycin concentration indicated. Cell proliferation was assessed by CCK-8 assay. Mean  $\pm$  SEM of triplicate determination; data are representative of two independent experiments.

**Supplementary Table 1: Stromal tissue sources from published data sets used for comparison to tumor-associated candidate genes in TAFs as identified by within this study**

| ID       | Organ     | Tumor Type                      | #samples     |               |
|----------|-----------|---------------------------------|--------------|---------------|
|          |           |                                 | Tumor stroma | Normal stroma |
| GSE40595 | Ovary     | Ovarian cancer                  | 31           | 8             |
| GSE38666 | Ovary     | Ovarian cancer                  | 7            | 8             |
| GSE45001 | Bile duct | Intrahepatic cholangiocarcinoma | 10           | 10            |
| GSE26910 | Breast    | Invasive primary breast cancer  | 6            | 6             |
| GSE26910 | Prostate  | Primary prostate cancer         | 6            | 6             |

Supplementary Table 2: Multivariate survival analysis of the colon tumor patients after surgery (n=77)

| Variable                           | B      | SE   | Wald   | df | Sig.   | Exp(B) | 95.0% CI for Exp(B) |       |
|------------------------------------|--------|------|--------|----|--------|--------|---------------------|-------|
|                                    |        |      |        |    |        |        | Lower               | Upper |
| Group (by <i>TTL</i> mRNA level) * | -2.685 | .430 | 38.944 | 1  | <0.001 | .068   | .029                | .159  |
| sex                                | -.604  | .306 | 3.901  | 1  | .048   | .547   | .300                | .995  |
| age                                | -.005  | .010 | .214   | 1  | .644   | .995   | .976                | 1.015 |
| alcohol intake                     | .620   | .350 | 3.128  | 1  | .077   | 1.859  | .935                | 3.694 |
| infection                          | -.235  | .354 | .439   | 1  | .508   | .791   | .395                | 1.583 |
| inflammation                       | .118   | .328 | .128   | 1  | .720   | 1.125  | .591                | 2.140 |
| tumor stage                        | 1.271  | .403 | 9.948  | 1  | .002   | 3.564  | 1.618               | 7.850 |
| tumor diameter                     | -.021  | .039 | .301   | 1  | .583   | .979   | .906                | 1.057 |

\* The patients were grouped into  $TTL^{high}$  and  $TTL^{low}$  based on the relative *TTL* mRNA levels within the tumor.

**Supplementary Table 3: Correlation of *TTL* mRNA levels in colon tumor tissues from colon cancer patients grouped along patient characteristics**

|                    | N  | Tumoral <i>TTL</i> * | <i>P</i> value |
|--------------------|----|----------------------|----------------|
| Total              | 77 |                      |                |
| Sex                |    |                      |                |
| Male               | 41 | 1.03 ± 0.16          | 0.08           |
| Female             | 36 | 1.93 ± 0.29          |                |
| Ages (yr)          |    |                      |                |
| < 60               | 39 | 1.85 ± 0.31          | 0.75           |
| ≥ 60               | 38 | 1.72 ± 0.31          |                |
| TNM stages         |    |                      |                |
| Tumor diameter     |    |                      |                |
| < 10 mm            | 31 | 1.61 ± 0.31          | 0.83           |
| ≥ 10mm             | 46 | 1.75 ± 0.42          |                |
| Tumor stage        |    |                      |                |
| T2                 | 19 | 1.34 ± 0.31          | 0.0001         |
| T3                 | 42 | 2.28 ± 0.32          |                |
| T4                 | 16 | 0.87 ± 0.31          |                |
| Node involvement   |    |                      |                |
| N0                 | 60 | 1.68 ± 0.24          | 0.44           |
| N1                 | 17 | 2.04 ± 0.45          |                |
| Metastasis         |    |                      |                |
| M0                 | 52 | 1.92 ± 0.25          | 0.21           |
| M1                 | 25 | 1.23 ± 0.33          |                |
| Bowel inflammation |    |                      |                |
| Yes                | 28 | 1.52 ± 0.33          | 0.36           |
| No                 | 49 | 1.93 ± 0.28          |                |

\* Relative human *TTL* expression is shown as *TTL/GAPDH*.

† Statistics: Tumor stage, one-way ANOVA; others, Student's *t* test.

Supplementary Table 4: Multivariate survival analysis of the liver tumor patients after surgery (n=31)

| Variable       | B     | SE    | Wald  | df | Sig. | Exp(B) | 95.0% CI for Exp(B) |        |
|----------------|-------|-------|-------|----|------|--------|---------------------|--------|
|                |       |       |       |    |      |        | Lower               | Upper  |
| group*         | -.448 | .556  | .648  | 1  | .421 | .639   | .215                | 1.901  |
| sex            | .570  | .905  | .397  | 1  | .528 | 1.769  | .300                | 10.424 |
| age            | -.008 | .029  | .084  | 1  | .772 | .992   | .936                | 1.050  |
| alcohol intake | .649  | .583  | 1.239 | 1  | .266 | 1.914  | .610                | 6.004  |
| tumor stage    | .109  | .705  | .024  | 1  | .877 | 1.115  | .280                | 4.437  |
| tumor diameter | .018  | .120  | .023  | 1  | .880 | 1.018  | .805                | 1.289  |
| liver fibrosis | .608  | 1.138 | .285  | 1  | .593 | 1.837  | .197                | 17.094 |

\* The patients were grouped into  $TTL^{high}$  and  $TTL^{low}$  based on the relative *TTL* mRNA-levels within the tumor.
